# Supplementary material for: Exploring potential causal genetic variants and genes for endometrial cancer: Open Targets Genetics, Mendelian randomization, and multi-tissue transcriptome-wide association analysis
Source: PubMed Central journal article supplement — Transl Cancer Res. 2024 Nov 21;13(11):5971–82. doi: 10.21037/tcr-24-887 (PMC11651742; doi:10.21037/tcr-24-887), 2024-11-21
Supplement: tcr-13-11-5971-supplementary.pdf [file tcr-13-11-5971-supplementary.pdf]

**Table S1** Default parameters in the SMR analyses

| Parameter      | Meaning                                                                                                            | Default value |
|----------------|--------------------------------------------------------------------------------------------------------------------|---------------|
| Maf            | Removes SNPs based on a minor allele frequency (MAF) threshold in the reference sample                             | 0.01          |
| Diff-freq      | Excludes SNPs with allele frequency differences between any pairwise data sets larger than the specified threshold | 0.2           |
| Diff-freq-prop | Stops the analysis if the proportion of SNPs being excluded by --diff-freq is larger than the specified value      | 0.05          |
| Peqtl-smr      | P value threshold to select the top associated eQTL for the SMR test                                               | 5.00E-08      |
| Peqtl-heidi    | Threshold of eQTL P value to select eQTLs for the HEIDI test                                                       | 1.57E-03      |
| Ld-upper-limit | Upper LD r-squared threshold used to prune SNPs (eQTLs) in the HEIDI test                                          | 0.9           |
| Ld-lower-limit | Lower LD r-squared threshold used to prune SNPs (eQTLs) in the HEIDI test                                          | 0.05          |
| Heidi-min-m    | Minimum requirement of the number of cis-SNPs used in the HEIDI test                                               | 3             |
| Heidi-max-m    | Maximum number of eQTLs used in the HEIDI test                                                                     | 20            |
| Cis-wind       | Defines a window centred around the probe to select cis-eQTLs (passing a P value threshold) for the SMR analysis   | 2,000 kb      |

eQTL, expression quantitative trait loci; HEIDI, heterogeneity in dependent instruments; MAF, minor allele frequency; LD, linkage disequilibrium; SNP, single-nucleotide polymorphism; SMR, summary data-based Mendelian randomization; FDR, false discovery rate; GWAS, genome-wide association studies.

**Table S2** Genes showing potential pleiotropic association with EC using CAGE eQTL data

| probeID      | ProbeChr | Gene  | Probe_bp | topSNP     | topSNP_chr | topSNP_bp | A1 | A2 | Freq     | b_GWAS   | se_GWAS  | p_GWAS   | b_eQTL   | se_eQTL  | p_eQTL   | b_SMR  | se_SMR | p_SMR    | p_HEIDI  | nsnp_HEIDI | p_SMR_FDR |
|--------------|----------|-------|----------|------------|------------|-----------|----|----|----------|----------|----------|----------|----------|----------|----------|--------|--------|----------|----------|------------|-----------|
| ILMN_1751400 | 17       | SKAP1 | 46210873 | rs2938483  | 17         | 46318004  | C  | T  | 0.347561 | -0.0886  | 0.015646 | 1.49E-08 | 0.479392 | 0.027469 | 3.32E-68 | -0.185 | 0.034  | 7.19E-08 | 1.25E-05 | 20         | 0.000613  |
| ILMN_2369018 | 17       | EVI2A | 29644832 | rs7505     | 17         | 29644852  | G  | A  | 0.359756 | 0.074118 | 0.015541 | 1.85E-06 | 0.723888 | 0.027623 | #####    | 0.102  | 0.022  | 2.70E-06 | 0.379    | 20         | 0.012     |
| ILMN_1809347 | 15       | SRP14 | 40328444 | rs17722526 | 15         | 40320267  | G  | A  | 0.378049 | 0.08769  | 0.015726 | 2.46E-08 | -0.21392 | 0.028925 | 1.41E-13 | -0.410 | 0.092  | 8.49E-06 | 0.225    | 20         | 0.023     |
| ILMN_1733579 | 17       | EVI2A | 29645189 | rs2525570  | 17         | 29681245  | A  | G  | 0.371951 | 0.07104  | 0.015533 | 4.80E-06 | -0.4421  | 0.027497 | 3.63E-58 | -0.161 | 0.037  | 1.09E-05 | 0.425    | 20         | 0.023     |
| ILMN_1683950 | 17       | SNX11 | 46200008 | rs62064953 | 17         | 46193967  | C  | T  | 0.189024 | -0.08302 | 0.018841 | 1.05E-05 | -0.59093 | 0.031734 | 2.15E-77 | 0.140  | 0.033  | 1.80E-05 | 0.000    | 20         | 0.031     |
| ILMN_1696051 | 17       | SNX11 | 46188096 | rs12949879 | 17         | 46158050  | C  | T  | 0.189024 | -0.08257 | 0.018836 | 1.17E-05 | -0.46116 | 0.031266 | 3.09E-49 | 0.179  | 0.043  | 2.65E-05 | 0.000    | 20         | 0.038     |

The GWAS summarized data can be downloaded at <https://www.ebi.ac.uk/gwas/studies/GCST006464>. The CAGE eQTL data can be downloaded at <https://cnsgenomics.com/data/SMR/#eQTLsummarydata>. PeQTL is the P-value of the top associated cis-eQTL in the eQTL analysis, and PGWAS is the P-value for the top associated cis-eQTL in the GWAS analysis. Beta is the estimated effect size in SMR analysis, SE is the corresponding standard error, PSMR is the P value for SMR analysis and PHEIDI is the P value for the HEIDI test. CAGE, Consortium for the Architecture of Gene Expression; CHR, chromosome; EC, endometrial cancer; eQTL, expression quantitative trait loci; HEIDI, heterogeneity in dependent instruments; SNP, single-nucleotide polymorphism; SMR, summary data-based Mendelian randomization; FDR, false discovery rate; GWAS, genome-wide association studies.

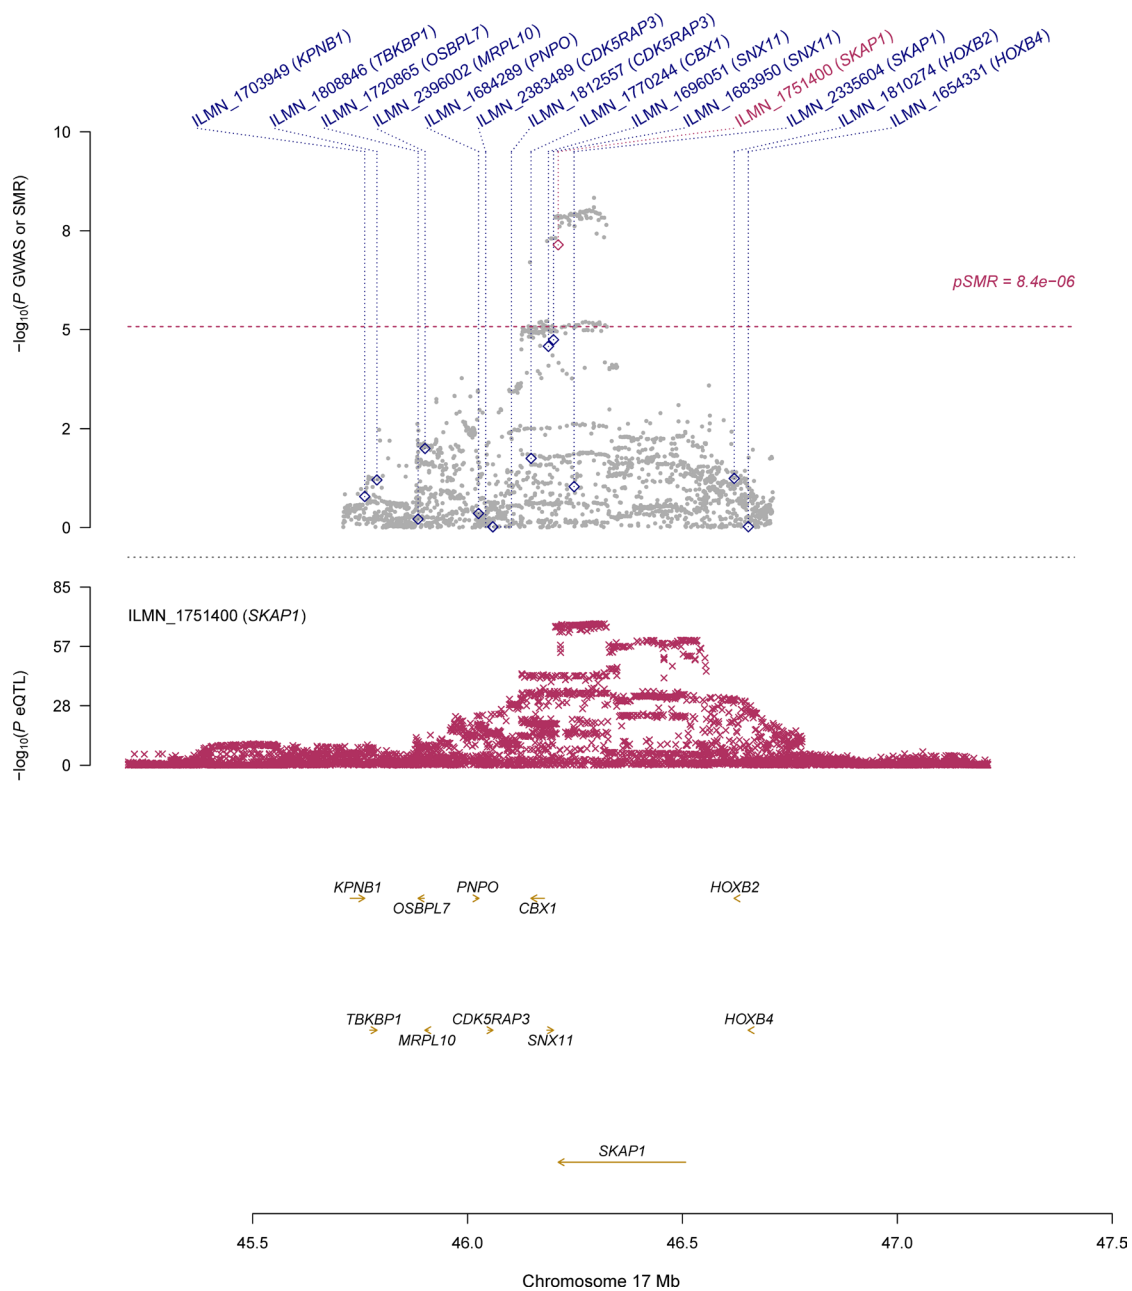

**Figure S1** Pleiotropic association of *SKAP1* and *SNX11* with EC. Top plot, grey dots represent the  $-\log(P)$  values for SNPs from the GWAS of EC, with hollow rhombuses indicating that the probes do not pass the HEIDI test. Middle plot, eQTL results. Bottom plot, location of genes tagged by the probes. EC, endometrial cancer; eQTL, expression quantitative trait loci; GWAS, genome-wide association study; HEIDI, heterogeneity in dependent instruments; SMR, Summary-based Mendelian Randomization; SNP, single nucleotide polymorphism.

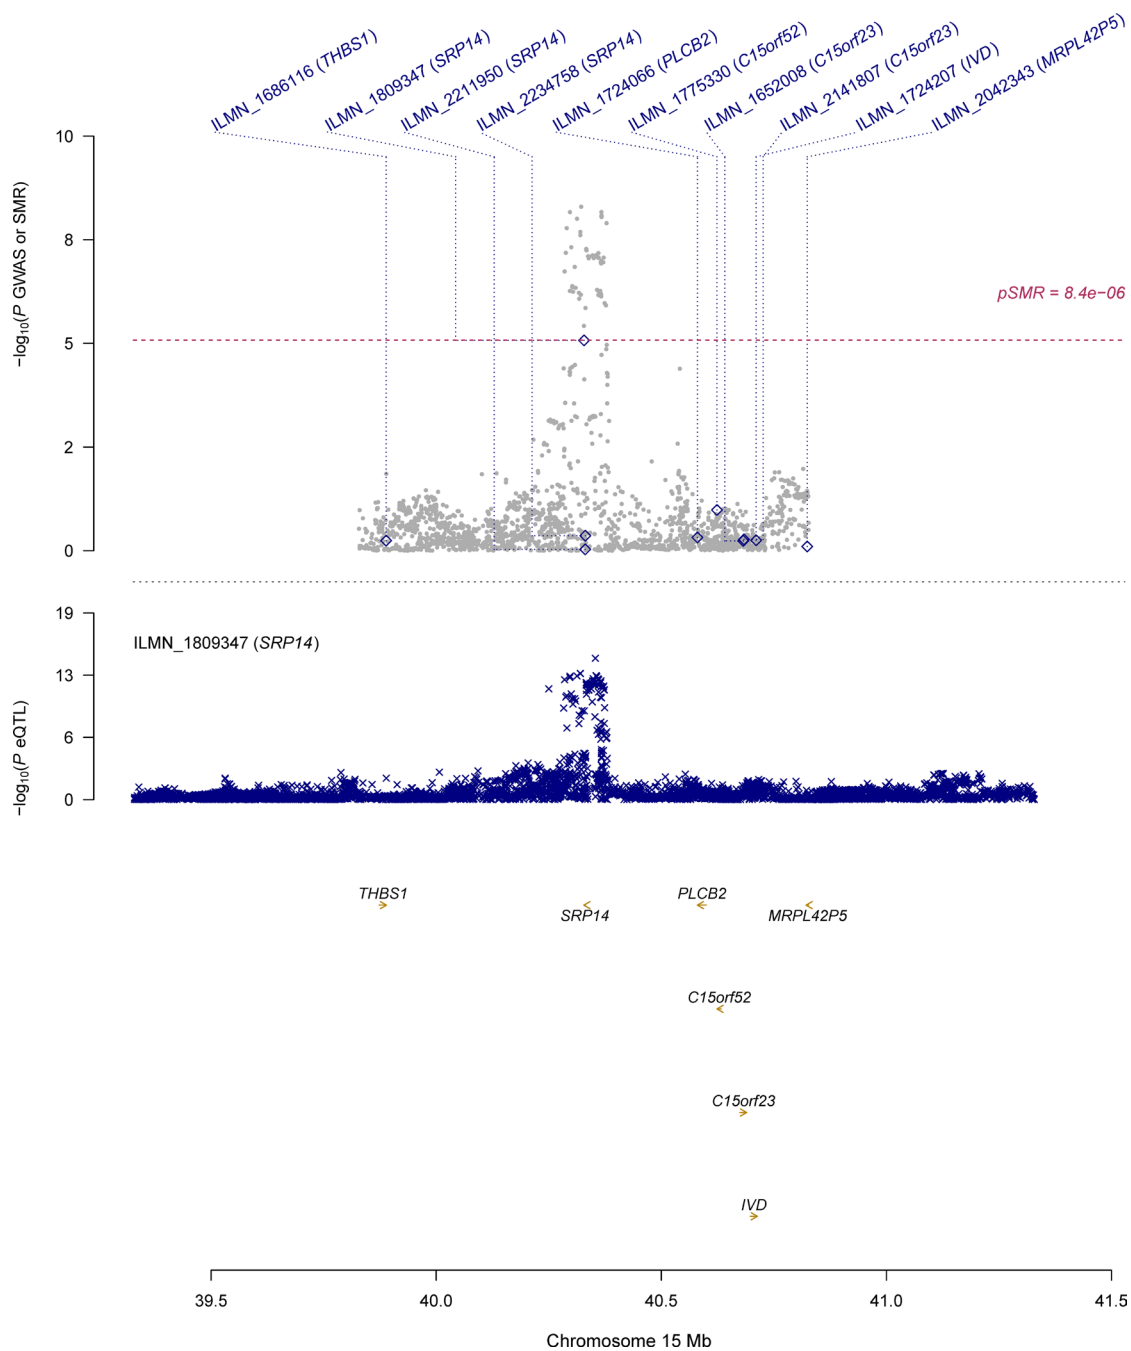

**Figure S2** Pleiotropic association of *SRP14* with EC. Top plot, grey dots represent the  $-\log(P \text{ values})$  for SNPs from the GWAS of EC, with hollow rhombuses indicating that the probes do not pass the HEIDI test. Middle plot, eQTL results. Bottom plot, location of genes tagged by the probes. EC, endometrial cancer; eQTL, expression quantitative trait loci; GWAS, genome-wide association study; HEIDI, heterogeneity in dependent instruments; SMR, Summary-based Mendelian Randomization; SNP, single nucleotide polymorphism.

**Table S3** Significant genes identified by transcriptome-wide association analysis in 22 tissues

| Gene                | CHR | P0          | P1          | HSQ    | BEST.GWAS.ID | BEST.GWAS.Z | EQTL.ID    | EQTL.R2  | EQTL.Z | EQTL.GWAS.Z | NSNP | NWGT | MODEL | MODEL.CV.R2 | MODEL.CV.PV | TWAS.Z   | TWAS.P   | tissue                   | FDR      |
|---------------------|-----|-------------|-------------|--------|--------------|-------------|------------|----------|--------|-------------|------|------|-------|-------------|-------------|----------|----------|--------------------------|----------|
| <i>HECTD4</i>       | 12  | 112,597,992 | 112,819,896 | 0.0617 | rs11066188   | -5.21       | rs7294902  | 0.004402 | -3.92  | 2.1589      | 323  | 15   | enet  | 0.019       | 0.01        | -5.8429  | 5.13E-09 | Adipose_Subcutaneous     | 1.79E-05 |
| <i>EIF3CL</i>       | 16  | 28,390,900  | 28,415,200  | 0.1102 | rs28472312   | -4.78       | rs7189927  | 0.078487 | 6.2    | 3.18832     | 247  | 9    | enet  | 0.14        | 7.70E-12    | 4.74853  | 2.05E-06 | Adipose_Subcutaneous     | 0.002392 |
| <i>ATF7IP2</i>      | 16  | 10,420,291  | 10,577,495  | 0.2442 | rs12597514   | 4.36        | rs11645096 | 0.13105  | -7.12  | 4.05767     | 659  | 4    | lasso | 0.17        | 5.70E-14    | -4.74734 | 2.06E-06 | Adipose_Subcutaneous     | 0.002392 |
| <i>SNX11</i>        | 17  | 46,180,719  | 46,200,436  | 0.1422 | rs8072282    | -5.73       | rs2051821  | 0.105497 | -6.9   | -4.38272    | 451  | 9    | lasso | 0.12        | 2.60E-10    | 4.64529  | 3.40E-06 | Adipose_Subcutaneous     | 0.002961 |
| <i>LINC00674</i>    | 17  | 66,098,049  | 66,111,659  | 0.1164 | rs6504548    | 4.68        | rs6504574  | 0.126682 | 6.32   | 3.992899    | 311  | 6    | enet  | 0.14        | 9.80E-12    | 4.18625  | 2.84E-05 | Adipose_Subcutaneous     | 0.019783 |
| <i>EIF3C</i>        | 16  | 28,699,879  | 28,747,051  | 0.1219 | rs28472312   | -4.78       | rs28472312 | 0.041134 | -5.22  | -4.78103    | 197  | 12   | enet  | 0.073       | 1.40E-06    | 4.08701  | 4.37E-05 | Adipose_Subcutaneous     | 0.025368 |
| <i>SH3GL1P3</i>     | 17  | 66,130,816  | 66,131,745  | 0.0773 | rs6504548    | 4.68        | rs6504574  | 0.059905 | 4.52   | 3.99733     | 309  | 1    | top1  | 0.06        | 1.20E-05    | 3.99733  | 6.41E-05 | Adipose_Subcutaneous     | 0.031894 |
| <i>C17orf67</i>     | 17  | 54,869,274  | 54,916,134  | 0.1509 | rs7209070    | 3.86        | rs7209070  | 0.057799 | -4.93  | 3.863544    | 476  | 5    | lasso | 0.059       | 1.30E-05    | -3.8969  | 9.74E-05 | Adipose_Subcutaneous     | 0.041796 |
| <i>EIF2AK4</i>      | 15  | 40,226,347  | 40,327,797  | 0.3819 | rs937213     | 5.85        | rs17722526 | 0.084883 | 7.29   | 5.57613     | 472  | 18   | enet  | 0.23        | 4.70E-19    | 3.8725   | 0.000108 | Adipose_Subcutaneous     | 0.041796 |
| <i>S100B</i>        | 21  | 48,018,875  | 48,025,121  | 0.2013 | rs2070429    | 4.06        | rs2239574  | 0.16764  | -8.46  | 3.6126      | 297  | 6    | enet  | 0.19        | 1.30E-15    | -3.8363  | 0.000125 | Adipose_Subcutaneous     | 0.043538 |
| <i>TEFM</i>         | 17  | 29,224,354  | 29,231,547  | 0.1178 | rs8065496    | 5.04        | rs11651802 | 0.019455 | -3.18  | 2.38646     | 272  | 14   | lasso | 0.052       | 0.00        | -5.22526 | 1.74E-07 | Adipose_Visceral_Omentum | 0.000353 |
| <i>EIF2AK4</i>      | 15  | 40,226,347  | 40,327,797  | 0.2304 | rs937213     | 5.85        | rs3736290  | 0.0806   | 4.8    | 4.9687      | 472  | 7    | lasso | 0.15        | 2.70E-08    | 4.86223  | 1.16E-06 | Adipose_Visceral_Omentum | 0.001177 |
| <i>SNX11</i>        | 17  | 46,180,719  | 46,200,436  | 0.2685 | rs8072282    | -5.73       | rs11079808 | 0.26913  | -7.12  | -4.42744    | 451  | 1    | top1  | 0.27        | 2.80E-14    | 4.427437 | 9.54E-06 | Adipose_Visceral_Omentum | 0.006455 |
| <i>SNX11</i>        | 17  | 46,180,719  | 46,200,436  | 0.1157 | rs8072282    | -5.73       | rs11079806 | 0.12     | -4.99  | -4.32706    | 451  | 1    | top1  | 0.12        | 3.90E-07    | 4.327061 | 1.51E-05 | Artery_Aorta             | 0.025394 |
| <i>NUPR1</i>        | 16  | 28,548,606  | 28,550,495  | 0.0896 | rs28472312   | -4.78       | rs4788076  | 0.007311 | -4.19  | 3.3712      | 198  | 5    | lasso | 0.041       | 0.00        | -4.2993  | 1.71E-05 | Artery_Aorta             | 0.025394 |
| <i>HECTD4</i>       | 12  | 112,597,992 | 112,819,896 | 0.051  | rs11066188   | -5.21       | rs11066320 | 0.019542 | 3.84   | -4.80838    | 323  | 1    | top1  | 0.02        | 0.01        | -4.8084  | 1.52E-06 | Artery_Tibial            | 0.005711 |
| <i>NFE2L1</i>       | 17  | 46,125,691  | 46,138,849  | 0.1279 | rs8072282    | -5.73       | rs8067470  | 0.003582 | 3.73   | -4.44       | 411  | 1    | top1  | 0.0036      | 0.16        | -4.44    | 9.12E-06 | Artery_Tibial            | 0.017094 |
| <i>CBX1</i>         | 17  | 46,147,414  | 46,178,883  | 0.0533 | rs8072282    | -5.73       | rs11079806 | 0.056956 | -4.46  | -4.33       | 437  | 1    | top1  | 0.057       | 2.90E-05    | 4.33     | 1.51E-05 | Artery_Tibial            | 0.017094 |
| <i>SNX11</i>        | 17  | 46,180,719  | 46,200,436  | 0.1058 | rs8072282    | -5.73       | rs1468270  | 0.081904 | -5.31  | -4.16       | 451  | 8    | lasso | 0.082       | 5.10E-07    | 4.29     | 1.82E-05 | Artery_Tibial            | 0.017094 |
| <i>EIF3CL</i>       | 16  | 28,390,900  | 28,415,200  | 0.0515 | rs28472312   | -4.78       | rs149299   | 0.034286 | 4.6    | 2.9778      | 247  | 2    | lasso | 0.035       | 0.00        | 4.214    | 2.51E-05 | Artery_Tibial            | 0.01886  |
| <i>SIVA1</i>        | 14  | 105,219,437 | 105,234,831 | 0.1532 | rs2498804    | 4.21        | rs7142772  | 0.138778 | -6.69  | 3.5669      | 355  | 10   | enet  | 0.15        | 6.90E-12    | -4.0856  | 4.40E-05 | Artery_Tibial            | 0.025387 |
| <i>TIPARP</i>       | 3   | 156,391,024 | 156,424,559 | 0.1309 | rs414683     | 4.13        | rs343992   | 0.019177 | 4.43   | 2.88177     | 426  | 17   | enet  | 0.05        | 8.20E-05    | 4.06842  | 4.73E-05 | Artery_Tibial            | 0.025387 |
| <i>PVT1</i>         | 8   | 128,806,779 | 129,113,499 | 0.1438 | rs7813501    | 5.93        | rs687279   | 0.003503 | 3.58   | 1.6739      | 753  | 3    | lasso | 0.0065      | 0.09        | 3.9196   | 8.87E-05 | Artery_Tibial            | 0.041656 |
| <i>COPZ2</i>        | 17  | 46,103,533  | 46,115,392  | 0.1253 | rs8072282    | -5.73       | rs17618704 | 0.00884  | -3.75  | -3.87       | 407  | 1    | top1  | 0.0088      | 0.06        | 3.87     | 0.000107 | Artery_Tibial            | 0.042078 |
| <i>C17orf67</i>     | 17  | 54,869,274  | 54,916,134  | 0.1145 | rs7209070    | 3.86        | rs7209070  | 0.02909  | -4.52  | 3.86        | 476  | 1    | top1  | 0.029       | 0.00        | -3.86    | 0.000112 | Artery_Tibial            | 0.042078 |
| <i>EIF2AK4</i>      | 15  | 40,226,347  | 40,327,797  | 0.2391 | rs937213     | 5.85        | rs3736290  | 0.104    | 5.05   | 4.9687      | 472  | 1    | top1  | 0.1         | 5.30E-06    | 4.9687   | 6.74E-07 | Breast_Mammary_Tissue    | 0.001331 |
| <i>SNX11</i>        | 17  | 46,180,719  | 46,200,436  | 0.1434 | rs8072282    | -5.73       | rs2051821  | 0.108    | -5.45  | -4.38272    | 451  | 1    | top1  | 0.11        | 3.40E-06    | 4.38272  | 1.17E-05 | Breast_Mammary_Tissue    | 0.008624 |
| <i>ATF7IP2</i>      | 16  | 10,420,291  | 10,577,495  | 0.2624 | rs12597514   | 4.36        | rs12597514 | 0.147065 | -5.63  | 4.3592      | 659  | 1    | top1  | 0.15        | 5.50E-08    | -4.3592  | 1.31E-05 | Breast_Mammary_Tissue    | 0.008624 |
| <i>RQCD1</i>        | 2   | 219,433,303 | 219,461,803 | 0.1925 | rs10208728   | -4          | rs10208728 | 0.0147   | 3.59   | -4.00042    | 365  | 5    | lasso | 0.025       | 0.02        | -3.87861 | 0.000105 | Breast_Mammary_Tissue    | 0.04582  |
| <i>AC074289.1</i>   | 2   | 64,370,373  | 64,479,993  | 0.1672 | rs6750096    | 3.68        | rs2251764  | 0.128    | -5.31  | 3.40334     | 421  | 16   | enet  | 0.15        | 3.80E-08    | -3.85355 | 0.000116 | Breast_Mammary_Tissue    | 0.04582  |
| <i>RP5-890E16.2</i> | 17  | 46,122,503  | 46,125,435  | 0.1359 | rs8072282    | -5.73       | rs1860862  | 0.03217  | -3.89  | -5.67228    | 410  | 1    | top1  | 0.032       | 0.01        | 5.67228  | 1.41E-08 | Colon_Transverse         | 2.54E-05 |
| <i>EIF2AK4</i>      | 15  | 40,226,347  | 40,327,797  | 0.3972 | rs937213     | 5.85        | rs17722526 | 0.162509 | 5.7    | 5.5761      | 472  | 1    | top1  | 0.16        | 3.60E-08    | 5.5761   | 2.46E-08 | Colon_Transverse         | 2.54E-05 |
| <i>SNX11</i>        | 17  | 46,180,719  | 46,200,436  | 0.1876 | rs8072282    | -5.73       | rs2109984  | 0.17196  | -5.56  | -4.51318    | 451  | 1    | top1  | 0.17        | 1.40E-08    | 4.51318  | 6.39E-06 | Colon_Transverse         | 0.004392 |
| <i>EIF2AK4</i>      | 15  | 40,226,347  | 40,327,797  | 0.3021 | rs937213     | 5.85        | rs17722526 | 0.10926  | 6.13   | 5.57613     | 472  | 6    | lasso | 0.14        | 9.40E-10    | 5.56726  | 2.59E-08 | Esophagus_Mucosa         | 8.57E-05 |
| <i>EEFSEC</i>       | 3   | 127,965,679 | 128,127,485 | 0.0737 | rs10934853   | -4.86       | rs2687729  | 0.079724 | -4.65  | -4.80734    | 417  | 1    | top1  | 0.08        | 1.40E-05    | 4.80733  | 1.53E-06 | Esophagus_Muscularis     | 0.002842 |

Table S3 (continued)

Table S3 (continued)

| Gene                | CHR | P0          | P1          | HSQ    | BEST.GWAS.ID | BEST.GWAS.Z | EQTL.ID    | EQTL.R2  | EQTL.Z | EQTL.GWAS.Z | NSNP | NWGT | MODEL | MODEL.CV.R2 | MODEL.CV.PV | TWAS.Z   | TWAS.P   | tissue                          | FDR      |
|---------------------|-----|-------------|-------------|--------|--------------|-------------|------------|----------|--------|-------------|------|------|-------|-------------|-------------|----------|----------|---------------------------------|----------|
| <i>RP5-890E16.2</i> | 17  | 46,122,503  | 46,125,435  | 0.0694 | rs8072282    | -5.73       | rs8067470  | 0.011161 | -3.88  | -4.43704    | 410  | 8    | lasso | 0.013       | 0.05        | 4.7786   | 1.76E-06 | Esophagus_Muscularis            | 0.002842 |
| <i>LRRC37A16P</i>   | 17  | 66,121,918  | 66,148,609  | 0.1159 | rs6504548    | 4.68        | rs4791212  | 0.030822 | 3.71   | 4.5439      | 323  | 1    | top1  | 0.031       | 0.01        | 4.5439   | 5.52E-06 | Esophagus_Muscularis            | 0.005941 |
| <i>SH2B1</i>        | 16  | 28,857,921  | 28,885,526  | 0.0642 | rs28472312   | -4.78       | rs2008514  | 0.029065 | -4.4   | 3.5494      | 172  | 21   | enet  | 0.059       | 0.00        | -4.0134  | 5.98E-05 | Esophagus_Muscularis            | 0.048274 |
| <i>ADAM1A</i>       | 12  | 112,337,067 | 112,340,042 | 0.1963 | rs653178     | -6.27       | rs3741993  | 0.072441 | -4.24  | -0.0154     | 180  | 22   | enet  | 0.1         | 4.30E-06    | 4.0591   | 4.93E-05 | Heart_Left_Ventricle            | 0.038124 |
| <i>FAM46C</i>       | 1   | 118,148,556 | 118,170,994 | 0.2517 | rs731017     | -4.17       | rs7549770  | 0.137532 | -6.02  | -4.0936     | 406  | 4    | lasso | 0.17        | 1.90E-09    | 4.0562   | 4.99E-05 | Heart_Left_Ventricle            | 0.038124 |
| <i>EIF3C</i>        | 16  | 28,699,879  | 28,747,051  | 0.0352 | rs28472312   | -4.78       | rs7189927  | 0.015046 | 3.89   | 3.18832     | 197  | 4    | lasso | 0.02        | 0.01        | 4.6097   | 4.03E-06 | Lung                            | 0.008013 |
| <i>EIF2AK4</i>      | 15  | 40,226,347  | 40,327,797  | 0.1414 | rs937213     | 5.85        | rs17722526 | 0.116805 | 5.83   | 5.57613     | 472  | 10   | enet  | 0.12        | 2.00E-09    | 4.5414   | 5.59E-06 | Lung                            | 0.008013 |
| <i>SNX11</i>        | 17  | 46,180,719  | 46,200,436  | 0.2001 | rs8072282    | -5.73       | rs1468270  | 0.121    | -6.2   | -4.1609     | 451  | 1    | top1  | 0.12        | 1.70E-09    | 4.1609   | 3.17E-05 | Lung                            | 0.030295 |
| <i>EEFSEC</i>       | 3   | 127,965,679 | 128,127,485 | 0.05   | rs10934853   | -4.86       | rs2248668  | 0.01193  | -4.4   | -4.6629     | 417  | 5    | lasso | 0.02        | 0.00        | 4.9759   | 6.49E-07 | Muscle_Skeletal                 | 0.001875 |
| <i>RP5-890E16.2</i> | 17  | 46,122,503  | 46,125,435  | 0.0891 | rs8072282    | -5.73       | rs16953461 | 0.039407 | 4.8    | 3.010733    | 410  | 3    | lasso | 0.068       | 3.10E-07    | 4.585159 | 4.54E-06 | Muscle_Skeletal                 | 0.006558 |
| <i>UQCCL1</i>       | 20  | 33,890,369  | 33,999,944  | 0.0963 | rs224333     | 4.03        | rs6088832  | 0.04434  | -5.24  | 3.58551     | 354  | 19   | enet  | 0.049       | 1.20E-05    | -4.0668  | 4.77E-05 | Muscle_Skeletal                 | 0.045935 |
| <i>EEFSEC</i>       | 3   | 127,965,679 | 128,127,485 | 0.0739 | rs10934853   | -4.86       | rs6439119  | 0.05753  | -5.31  | -4.83856    | 417  | 2    | lasso | 0.06        | 4.50E-05    | 4.77717  | 1.78E-06 | Nerve_Tibial                    | 0.007183 |
| <i>SNX11</i>        | 17  | 46,180,719  | 46,200,436  | 0.2389 | rs8072282    | -5.73       | rs1468270  | 0.182191 | -6.92  | -4.16091    | 451  | 7    | lasso | 0.21        | 5.30E-15    | 4.649355 | 3.33E-06 | Nerve_Tibial                    | 0.007183 |
| <i>EIF3C</i>        | 16  | 28,699,879  | 28,747,051  | 0.1451 | rs28472312   | -4.78       | rs8045689  | 0.0534   | 4.53   | 2.35097     | 197  | 6    | lasso | 0.083       | 1.80E-06    | 4.466735 | 7.94E-06 | Nerve_Tibial                    | 0.009836 |
| <i>RP5-890E16.2</i> | 17  | 46,122,503  | 46,125,435  | 0.1642 | rs8072282    | -5.73       | rs8067470  | 0.085057 | -5.58  | -4.43704    | 410  | 1    | top1  | 0.085       | 1.30E-06    | 4.437039 | 9.12E-06 | Nerve_Tibial                    | 0.009836 |
| <i>ABCC5</i>        | 3   | 183,637,722 | 183,735,803 | 0.2401 | rs9818518    | -3.65       | rs3792583  | 0.11342  | 5.76   | -3.49753    | 526  | 40   | enet  | 0.12        | 4.80E-09    | -4.16385 | 3.13E-05 | Nerve_Tibial                    | 0.027006 |
| <i>LRRC37A16P</i>   | 17  | 66,121,918  | 66,148,609  | 0.0854 | rs6504548    | 4.68        | rs7211282  | 0.075572 | 4.59   | 4.005139    | 323  | 1    | top1  | 0.076       | 5.00E-06    | 4.005139 | 6.20E-05 | Nerve_Tibial                    | 0.044578 |
| <i>EIF2AK4</i>      | 15  | 40,226,347  | 40,327,797  | 0.3958 | rs937213     | 5.85        | rs3736290  | 0.28556  | 6.63   | 4.9687      | 472  | 5    | lasso | 0.29        | 7.60E-13    | 5.68123  | 1.34E-08 | Pancreas                        | 2.18E-05 |
| <i>SNX11</i>        | 17  | 46,180,719  | 46,200,436  | 0.2802 | rs8072282    | -5.73       | rs9905800  | 0.108999 | -6.01  | -4.44303    | 451  | 13   | lasso | 0.14        | 3.10E-08    | 5.52429  | 3.31E-08 | Skin_Not_Sun_Exposed_Suprapubic | 8.13E-05 |
| <i>ATF7IP2</i>      | 16  | 10,420,291  | 10,577,495  | 0.3615 | rs12597514   | 4.36        | rs12165003 | 0.16592  | -6.47  | 4.24847     | 659  | 1    | top1  | 0.17        | 2.10E-09    | -4.24847 | 2.15E-05 | Skin_Not_Sun_Exposed_Suprapubic | 0.026413 |
| <i>ADSSL1</i>       | 14  | 105,190,523 | 105,213,647 | 0.316  | rs2498804    | 4.21        | rs2498804  | 0.154735 | -6.65  | 4.21182     | 353  | 24   | enet  | 0.2         | 1.80E-11    | -4.10471 | 4.05E-05 | Skin_Not_Sun_Exposed_Suprapubic | 0.03317  |
| <i>EIF3C</i>        | 16  | 28,699,879  | 28,747,051  | 0.073  | rs28472312   | -4.78       | rs10499    | 0.0132   | 3.73   | 3.20978     | 197  | 14   | enet  | 0.048       | 0.00        | 4.02012  | 5.82E-05 | Skin_Not_Sun_Exposed_Suprapubic | 0.035749 |
| <i>EIF2AK4</i>      | 15  | 40,226,347  | 40,327,797  | 0.336  | rs937213     | 5.85        | rs3736290  | 0.154    | 7.51   | 4.9687      | 472  | 1    | top1  | 0.15        | 8.90E-13    | 4.9687   | 6.74E-07 | Skin_Sun_Exposed_Lower_leg      | 0.002446 |
| <i>RP5-890E16.2</i> | 17  | 46,122,503  | 46,125,435  | 0.0844 | rs8072282    | -5.73       | rs2109984  | 0.0501   | -4.26  | -4.51318    | 410  | 1    | top1  | 0.05        | 5.30E-05    | 4.513181 | 6.39E-06 | Skin_Sun_Exposed_Lower_leg      | 0.010524 |
| <i>SNX11</i>        | 17  | 46,180,719  | 46,200,436  | 0.2241 | rs8072282    | -5.73       | rs9899461  | 0.288    | -9.54  | -4.4374     | 451  | 1    | top1  | 0.29        | 4.30E-24    | 4.437401 | 9.11E-06 | Skin_Sun_Exposed_Lower_leg      | 0.010524 |
| <i>BPTF</i>         | 17  | 65,821,640  | 65,980,494  | 0.1041 | rs6504548    | 4.68        | rs6504573  | 0.00973  | -3.82  | 3.406292    | 384  | 14   | enet  | 0.026       | 0.00        | -4.38458 | 1.16E-05 | Skin_Sun_Exposed_Lower_leg      | 0.010524 |
| <i>ATF7IP2</i>      | 16  | 10,420,291  | 10,577,495  | 0.2595 | rs12597514   | 4.36        | rs12165003 | 0.175169 | -7.87  | 4.24847     | 659  | 16   | enet  | 0.19        | 2.10E-15    | -4.22098 | 2.43E-05 | Skin_Sun_Exposed_Lower_leg      | 0.017637 |
| <i>HINT3</i>        | 6   | 126,277,927 | 126,301,387 | 0.0803 | rs984040     | -6.06       | rs6900105  | 0.013817 | 3.97   | -3.30416    | 270  | 4    | lasso | 0.028       | 0.00        | -4.00298 | 6.25E-05 | Skin_Sun_Exposed_Lower_leg      | 0.03504  |
| <i>EIF3C</i>        | 16  | 28,699,879  | 28,747,051  | 0.0739 | rs28472312   | -4.78       | rs10499    | 0.05707  | 5.54   | 3.20978     | 197  | 4    | lasso | 0.066       | 4.10E-06    | 3.92755  | 8.58E-05 | Skin_Sun_Exposed_Lower_leg      | 0.03504  |
| <i>ADSSL1</i>       | 14  | 105,190,523 | 105,213,647 | 0.2345 | rs2498804    | 4.21        | rs12590163 | 0.21736  | -8.16  | 3.9246      | 353  | 1    | top1  | 0.22        | 7.20E-18    | -3.9246  | 8.69E-05 | Skin_Sun_Exposed_Lower_leg      | 0.03504  |
| <i>SIVA1</i>        | 14  | 105,219,437 | 105,234,831 | 0.083  | rs2498804    | 4.21        | rs12590163 | 0.0312   | -4.61  | 3.9246      | 355  | 1    | top1  | 0.031       | 0.00        | -3.9246  | 8.69E-05 | Skin_Sun_Exposed_Lower_leg      | 0.03504  |
| <i>EIF2AK4</i>      | 15  | 40,226,347  | 40,327,797  | 0.2093 | rs937213     | 5.85        | rs17722526 | 0.131    | 4.84   | 5.5761      | 472  | 1    | top1  | 0.13        | 7.90E-07    | 5.5761   | 2.46E-08 | Stomach                         | 3.58E-05 |
| <i>SNX11</i>        | 17  | 46,180,719  | 46,200,436  | 0.1965 | rs8072282    | -5.73       | rs11079808 | 0.08901  | -5.01  | -4.42744    | 451  | 6    | lasso | 0.11        | 1.00E-05    | 4.48164  | 7.41E-06 | Stomach                         | 0.005391 |
| <i>RP5-890E16.2</i> | 17  | 46,122,503  | 46,125,435  | 0.2898 | rs8072282    | -5.73       | rs9905800  | 0.121284 | -6.41  | -4.44303    | 410  | 36   | enet  | 0.23        | 2.00E-10    | 5.17967  | 2.22E-07 | Testis                          | 0.0007   |

Table S3 (continued)

Table S3 (continued)

| Gene                 | CHR | P0          | P1          | HSQ    | BEST.GWAS.ID | BEST.GWAS.Z | EQTL.ID    | EQTL.R2  | EQTL.Z | EQTL.GWAS.Z | NSNP | NWGT | MODEL | MODEL.CV.R2 | MODEL.CV.PV | TWAS.Z   | TWAS.P   | tissue      | FDR      |
|----------------------|-----|-------------|-------------|--------|--------------|-------------|------------|----------|--------|-------------|------|------|-------|-------------|-------------|----------|----------|-------------|----------|
| <i>EIF3C</i>         | 16  | 28,699,879  | 28,747,051  | 0.0918 | rs28472312   | -4.78       | rs28472312 | 0.0514   | -4.38  | -4.78103    | 197  | 4    | lasso | 0.079       | 0.00        | 4.7621   | 1.92E-06 | Testis      | 0.003025 |
| <i>NUPR1</i>         | 16  | 28,548,606  | 28,550,495  | 0.0623 | rs28472312   | -4.78       | rs12448482 | 0.0139   | 3.66   | -3.49454    | 198  | 19   | enet  | 0.025       | 0.03        | -4.6016  | 4.19E-06 | Testis      | 0.003324 |
| <i>COPZ2</i>         | 17  | 46,103,533  | 46,115,392  | 0.3384 | rs8072282    | -5.73       | rs16953461 | 0.134379 | 6.7    | 3.01073     | 407  | 22   | enet  | 0.32        | 8.90E-15    | 4.60039  | 4.22E-06 | Testis      | 0.003324 |
| <i>SNX11</i>         | 17  | 46,180,719  | 46,200,436  | 0.2151 | rs8072282    | -5.73       | rs11079808 | 0.124638 | -4.75  | -4.42744    | 451  | 1    | top1  | 0.12        | 3.70E-06    | 4.42744  | 9.54E-06 | Testis      | 0.006012 |
| <i>NAV3</i>          | 12  | 78,224,685  | 78,606,790  | 0.2452 | rs1272489    | 5.05        | rs1920428  | 0.25696  | 6.43   | 4.07487     | 700  | 1    | top1  | 0.26        | 8.80E-12    | 4.07487  | 4.60E-05 | Testis      | 0.024158 |
| <i>ADSSL1</i>        | 14  | 105,190,523 | 105,213,647 | 0.5106 | rs2498804    | 4.21        | rs7142772  | 0.557414 | 9.34   | 3.56695     | 353  | 9    | enet  | 0.59        | 3.50E-32    | 4.03167  | 5.54E-05 | Testis      | 0.024938 |
| <i>EIF2AK4</i>       | 15  | 40,226,347  | 40,327,797  | 0.3093 | rs937213     | 5.85        | rs17722526 | 0.182    | 7.67   | 5.57613     | 472  | 15   | enet  | 0.23        | 3.00E-17    | 4.59471  | 4.33E-06 | Thyroid     | 0.016247 |
| <i>RP5-890E16.2</i>  | 17  | 46,122,503  | 46,125,435  | 0.0852 | rs8072282    | -5.73       | rs7224155  | 0.01513  | -4.46  | -4.45894    | 410  | 1    | top1  | 0.015       | 0.02        | 4.45894  | 8.24E-06 | Thyroid     | 0.016247 |
| <i>SNX11</i>         | 17  | 46,180,719  | 46,200,436  | 0.0812 | rs8072282    | -5.73       | rs11079806 | 0.087504 | -5.48  | -4.32706    | 451  | 1    | top1  | 0.088       | 3.20E-07    | 4.32706  | 1.51E-05 | Thyroid     | 0.016247 |
| <i>SEC61A1</i>       | 3   | 127,770,484 | 127,790,526 | 0.139  | rs10934853   | -4.86       | rs1030655  | 0.0749   | 5.19   | -4.31005    | 389  | 1    | top1  | 0.075       | 2.30E-06    | -4.31    | 1.63E-05 | Thyroid     | 0.016247 |
| <i>SRP14-AS1</i>     | 15  | 40,331,512  | 40,359,491  | 0.1712 | rs937213     | 5.85        | rs2291620  | 0.0509   | 4.4    | -3.96291    | 446  | 1    | top1  | 0.051       | 9.00E-05    | -3.96291 | 7.40E-05 | Thyroid     | 0.049173 |
| <i>AKT1</i>          | 14  | 105,235,686 | 105,262,088 | 0.4006 | rs2498804    | 4.21        | rs12590163 | 0.34144  | 9.77   | 3.92458     | 358  | 8    | lasso | 0.34        | 4.30E-27    | 3.93437  | 8.34E-05 | Thyroid     | 0.049173 |
| <i>ZBTB42</i>        | 14  | 105,266,933 | 105,271,049 | 0.1645 | rs2498804    | 4.21        | rs4983543  | 0.11376  | 6.01   | 3.90051     | 348  | 1    | top1  | 0.11        | 5.10E-09    | 3.90051  | 9.60E-05 | Thyroid     | 0.049173 |
| <i>RP11-982M15.2</i> | 14  | 105,235,686 | 105,236,608 | 0.3751 | rs2498804    | 4.21        | rs12590163 | 0.25111  | 8.97   | 3.92458     | 349  | 40   | enet  | 0.27        | 7.00E-21    | 3.86665  | 0.00011  | Thyroid     | 0.049173 |
| <i>PDLIM1</i>        | 10  | 96,997,329  | 97,050,781  | 0.0797 | rs7921420    | 3.83        | rs501603   | 0.0038   | 3.79   | 3.19622     | 533  | 4    | lasso | 0.006       | 0.10        | 3.86616  | 0.000111 | Thyroid     | 0.049173 |
| <i>EVI2A</i>         | 17  | 29,647,391  | 29,648,902  | 0.0655 | rs8065496    | 5.04        | rs12940802 | 0.038824 | -4.61  | 4.73147     | 359  | 1    | top1  | 0.039       | 0.00        | -4.73147 | 2.23E-06 | Whole_Blood | 0.004444 |
| <i>SNX11</i>         | 17  | 46,180,719  | 46,200,436  | 0.1202 | rs8072282    | -5.73       | rs9899461  | 0.104701 | -6.31  | -4.4374     | 451  | 18   | enet  | 0.11        | 2.90E-10    | 4.40843  | 1.04E-05 | Whole_Blood | 0.010364 |

HSQ, heritability of the gene; BEST.GWAS.ID, rsID of the most significant GWAS SNP in locus; BEST.GWAS.Z, Z-score of the most significant GWAS SNP in locus; EQTL.ID, rsID of the best eQTL in the locus; EQTL.R2, cross-validation R2 of the best eQTL in the locus; EQTL.Z, Z-score of the best eQTL in the locus; EQTL.GWAS.Z, GWAS Z-score for this eQTL; NSNP, number of SNPs in the locus; NWGT, Number of SNPs with non-zero weights in the model; MODEL, best performing model; MODEL.CV.R2, cross-validation R2 of the best performing model; MODEL.CV.PV, cross-validation P value of the best performing model; TWAS.Z, TWAS Z-score (our primary statistic of interest); TWAS.P, TWAS P value; FDR, false-discovery-rate adjusted P value.
